# Supplementary material
Source: PubMed Central journal article supplement (PMC3890948)

A

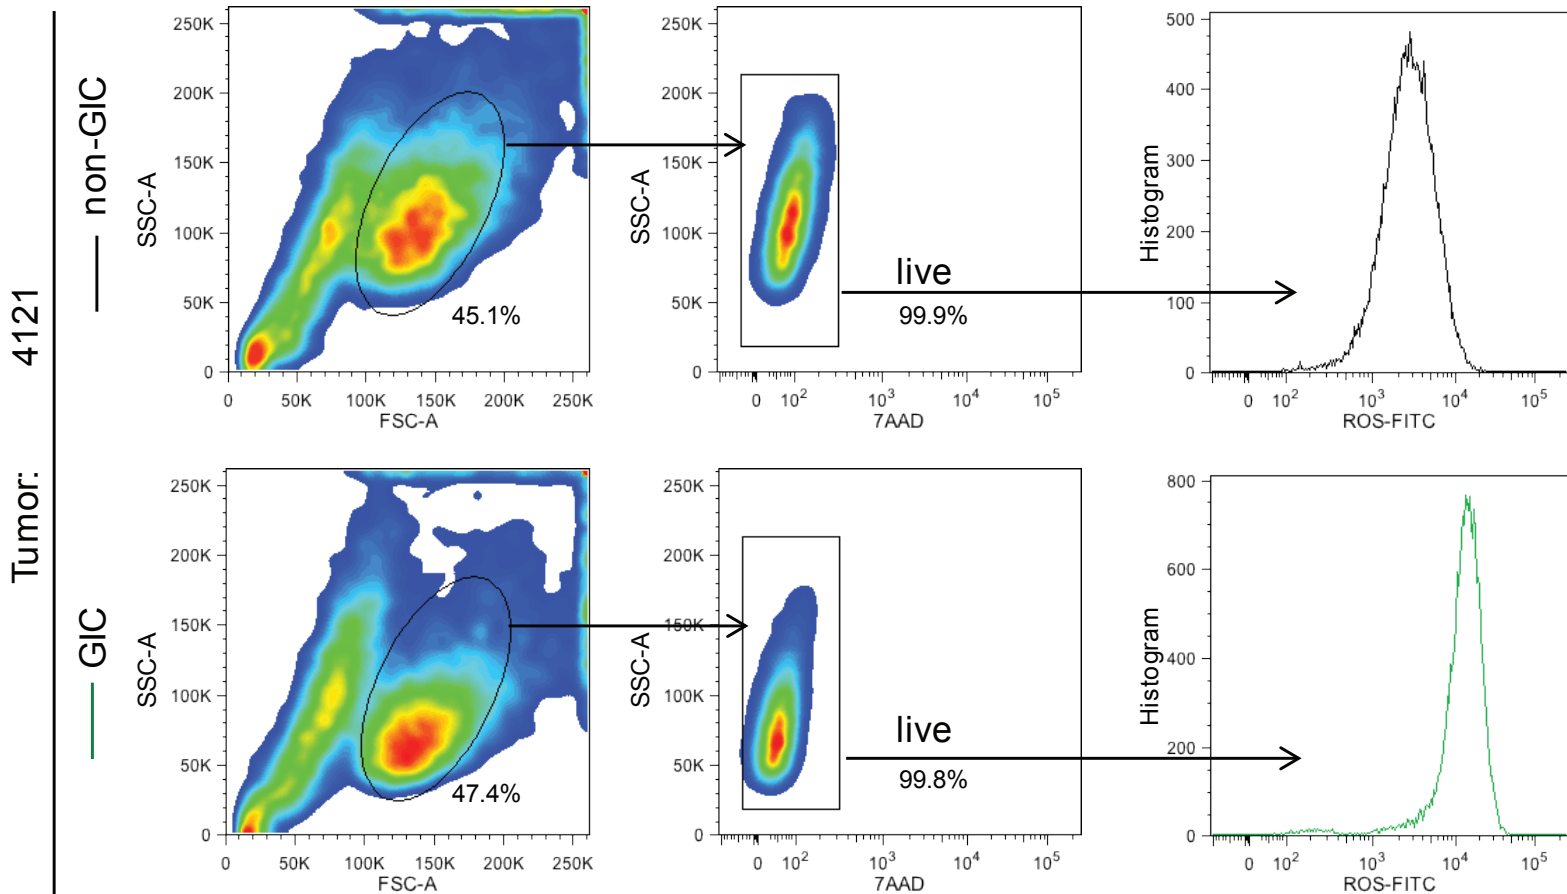

B

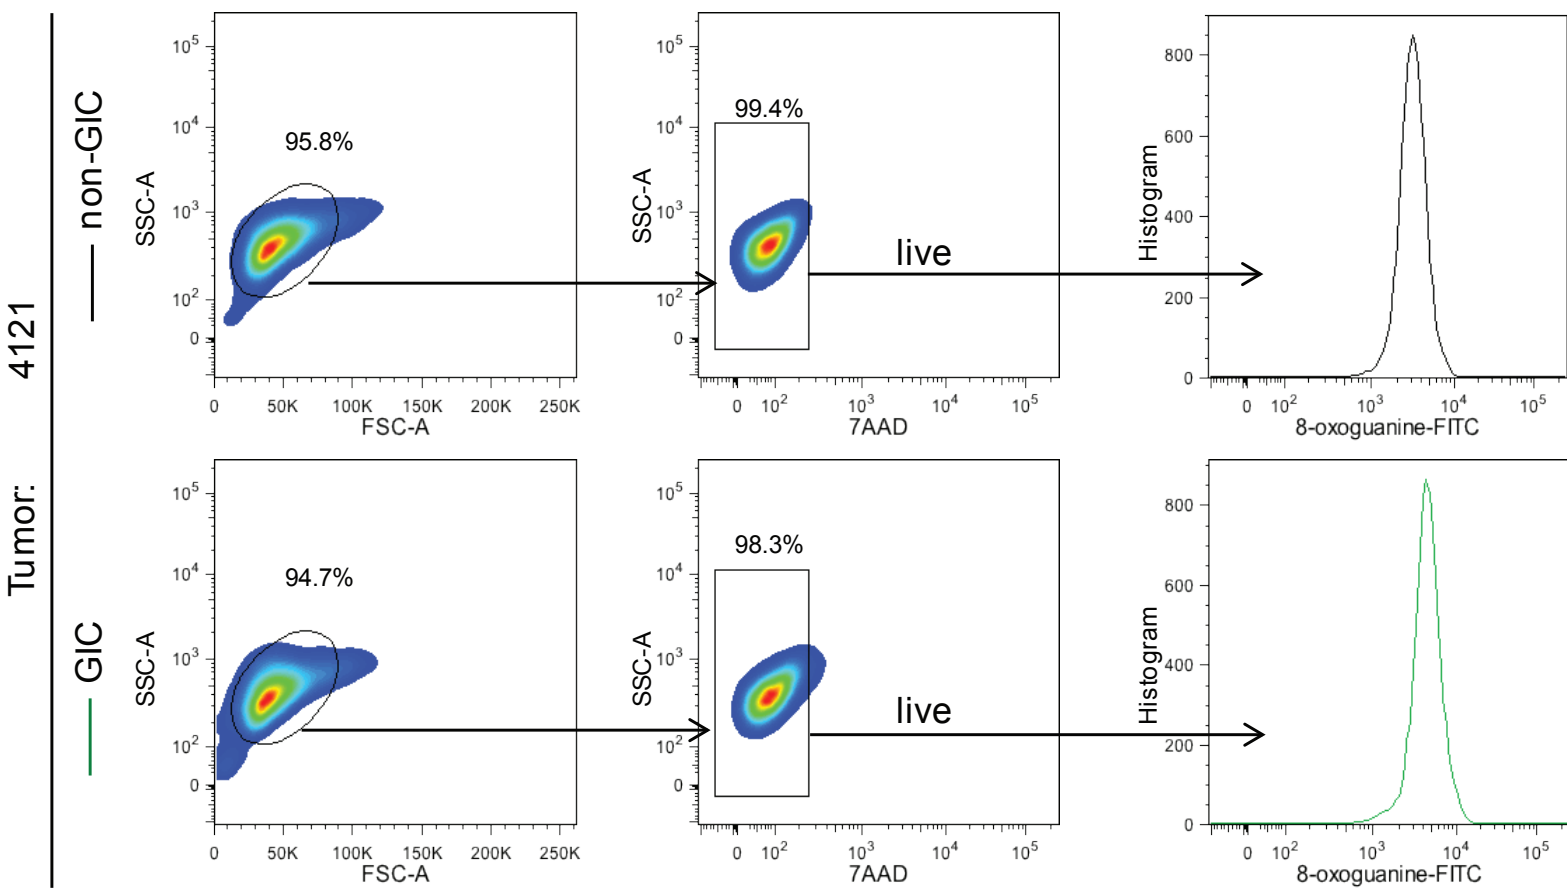

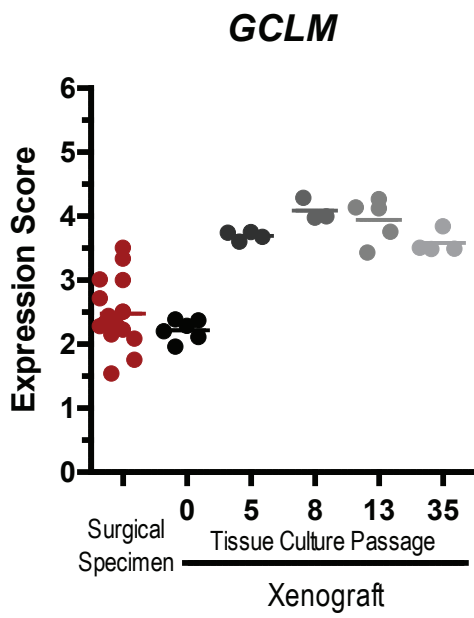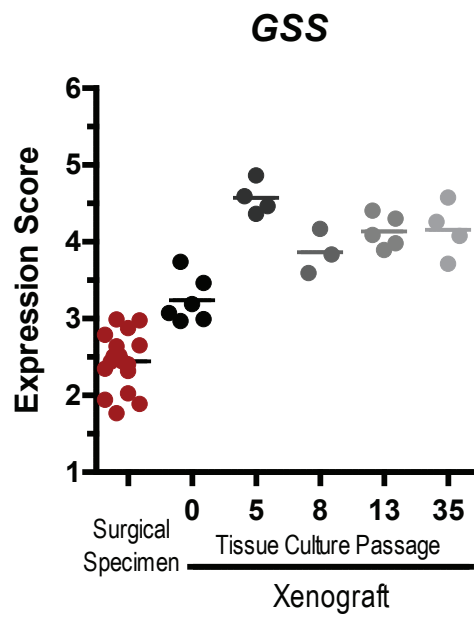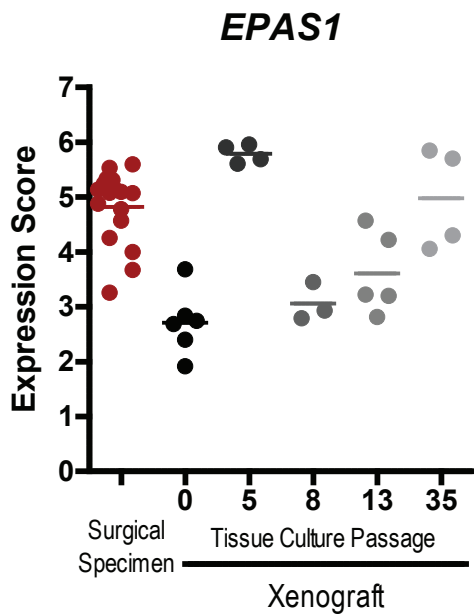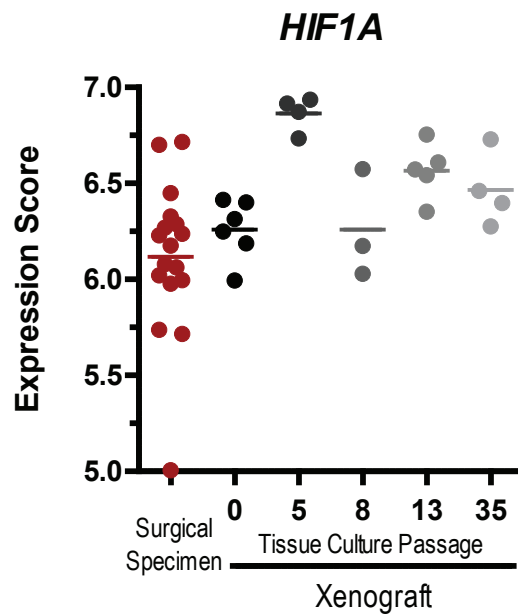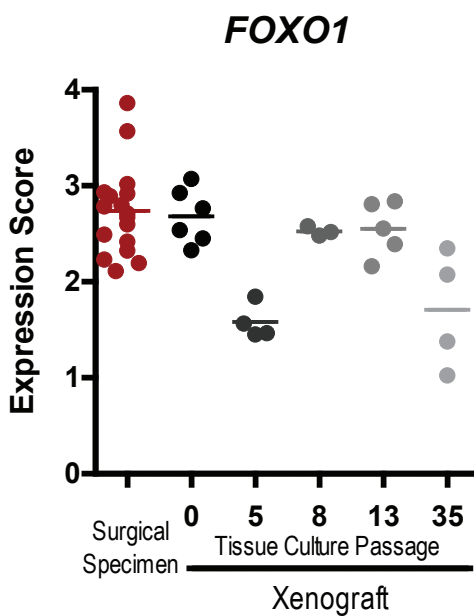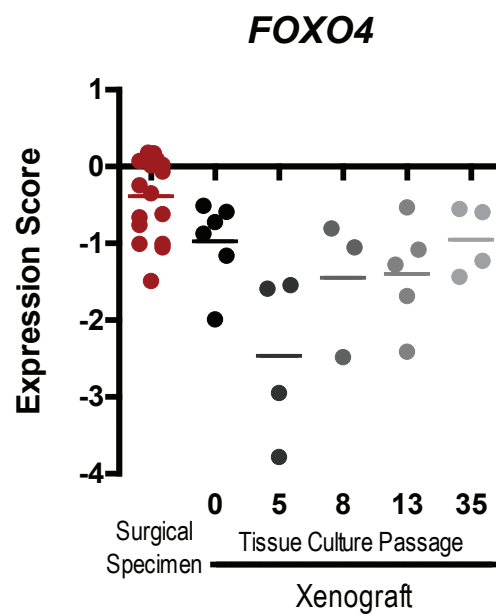

A

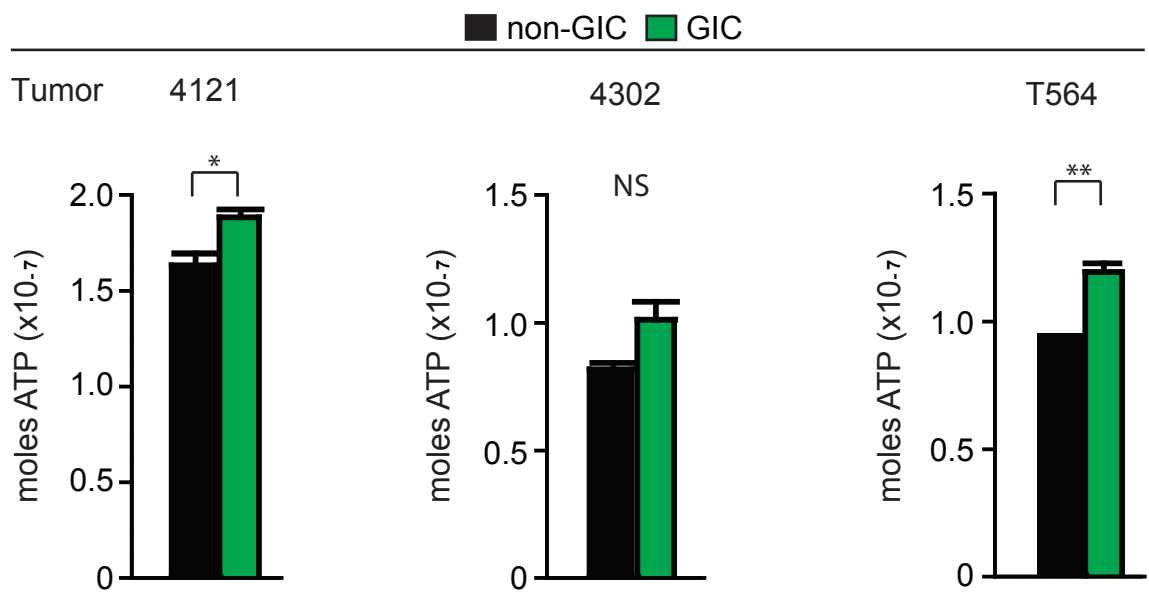

B

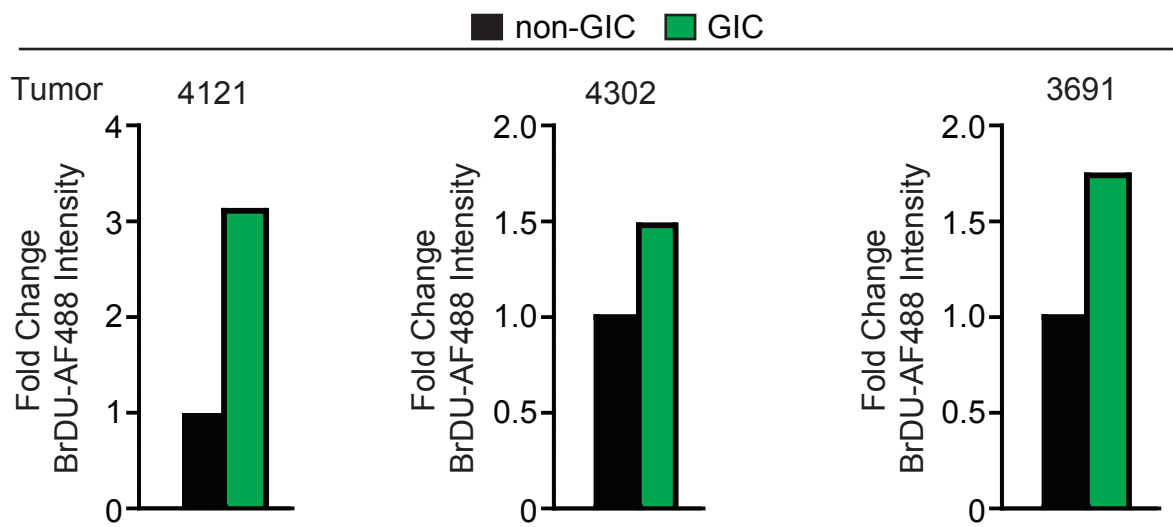

C

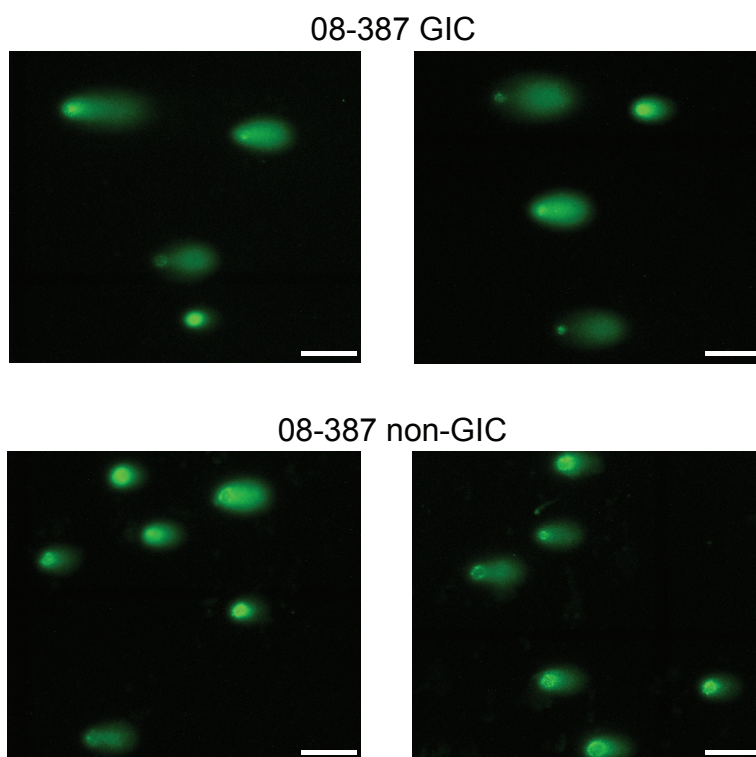

D

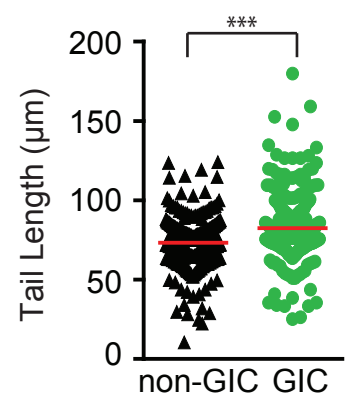

E

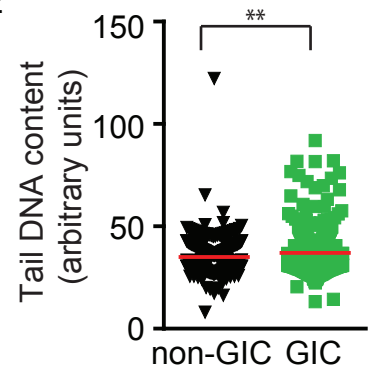

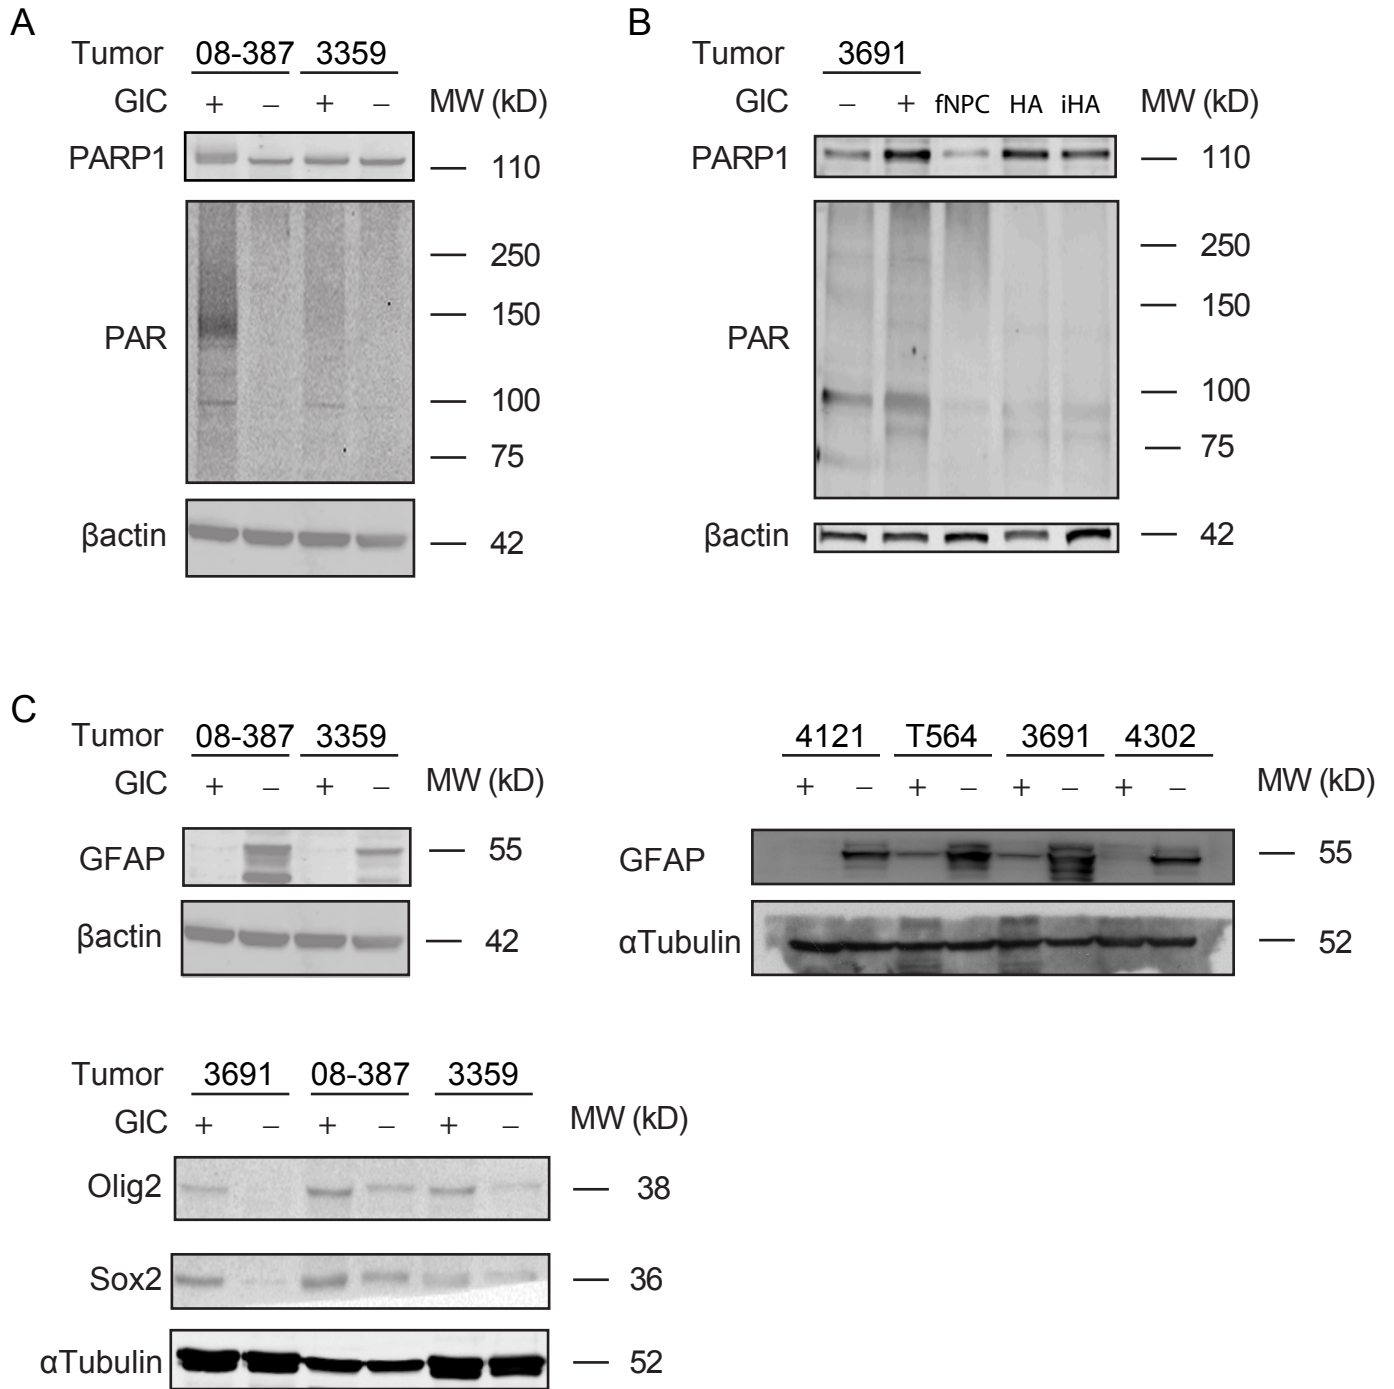

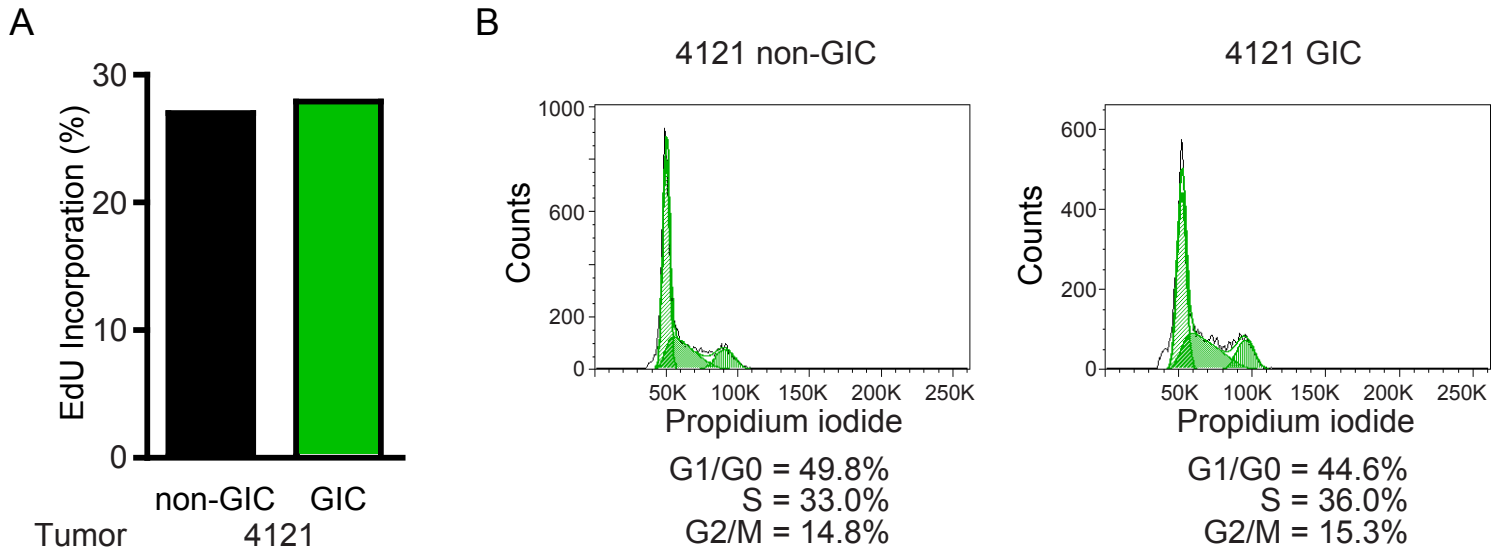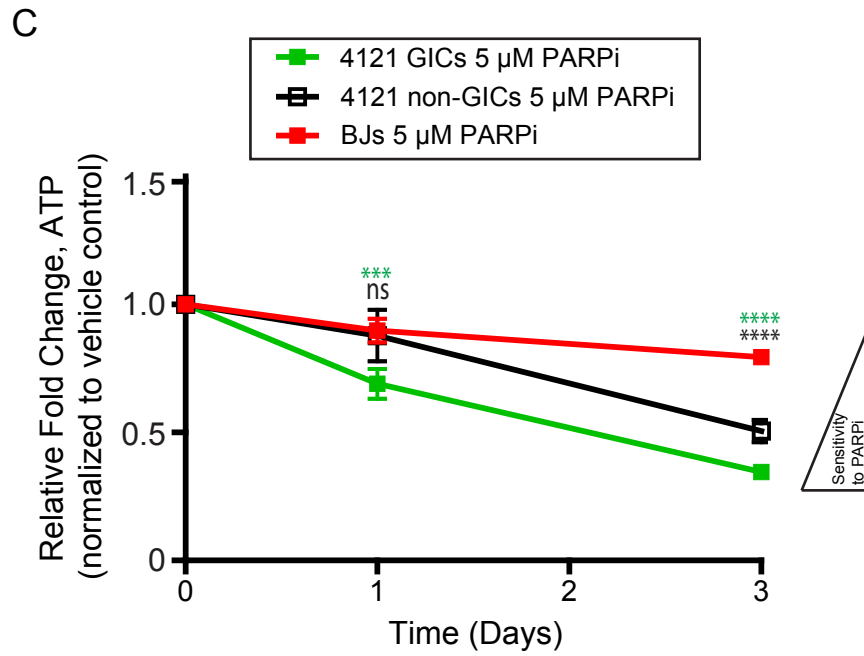

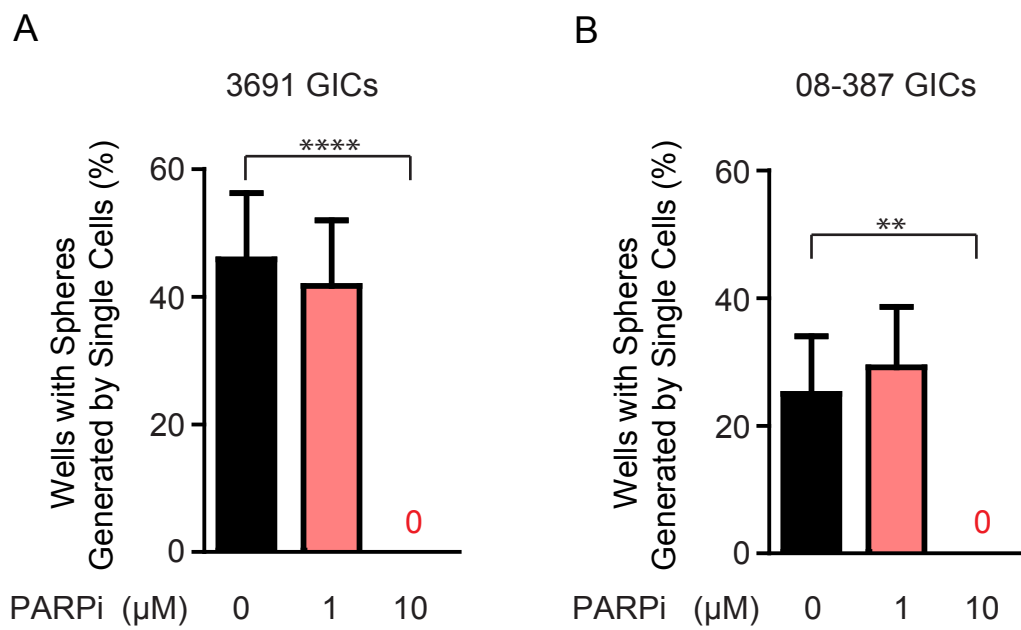

A

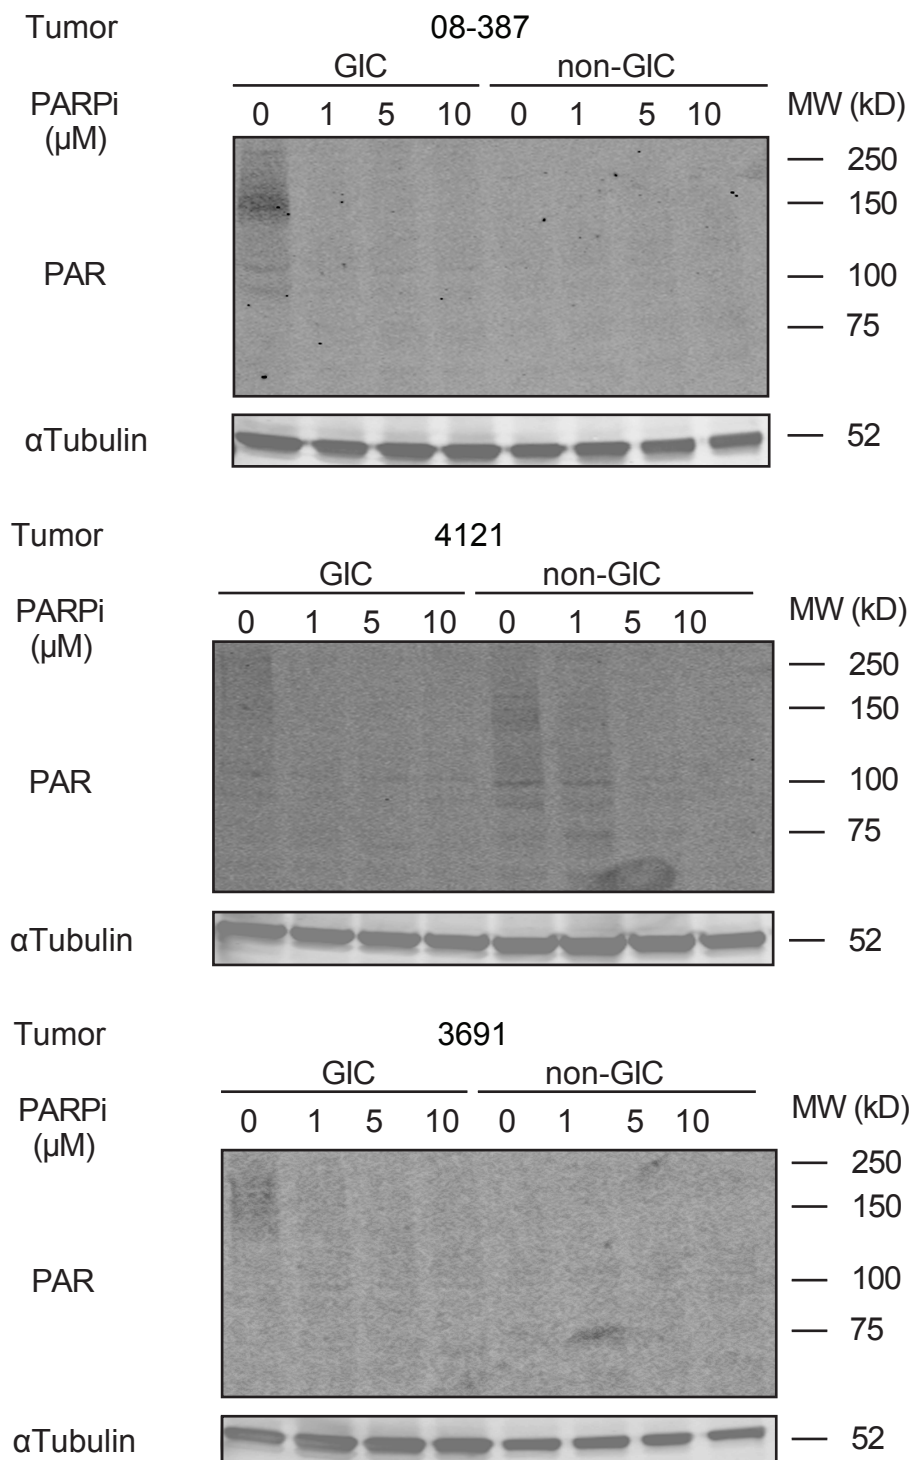

B

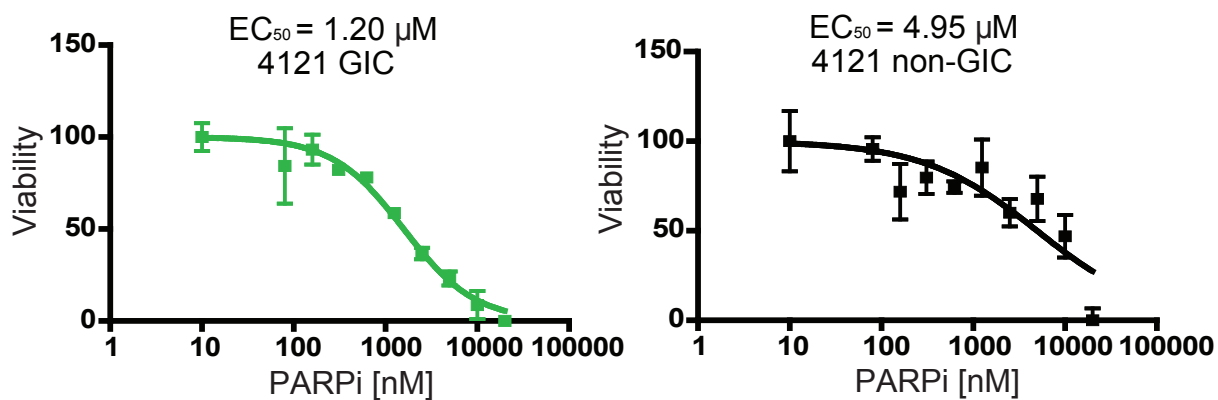

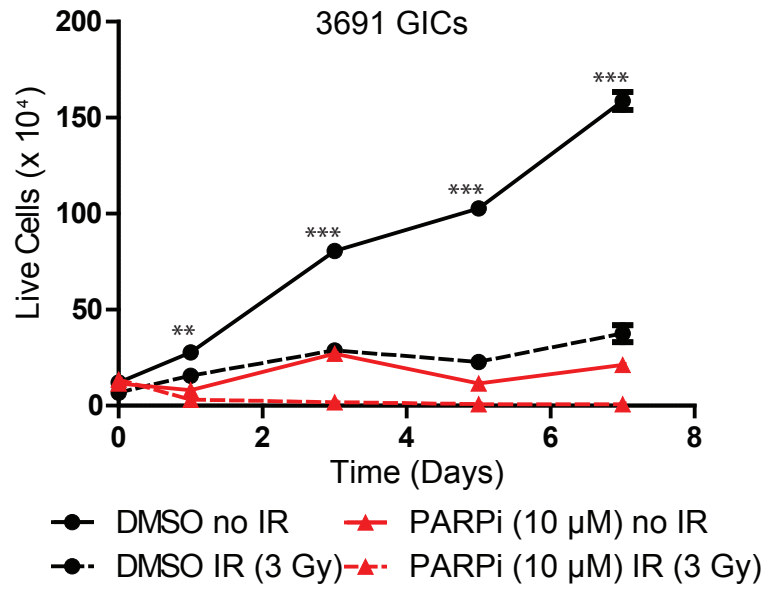



A

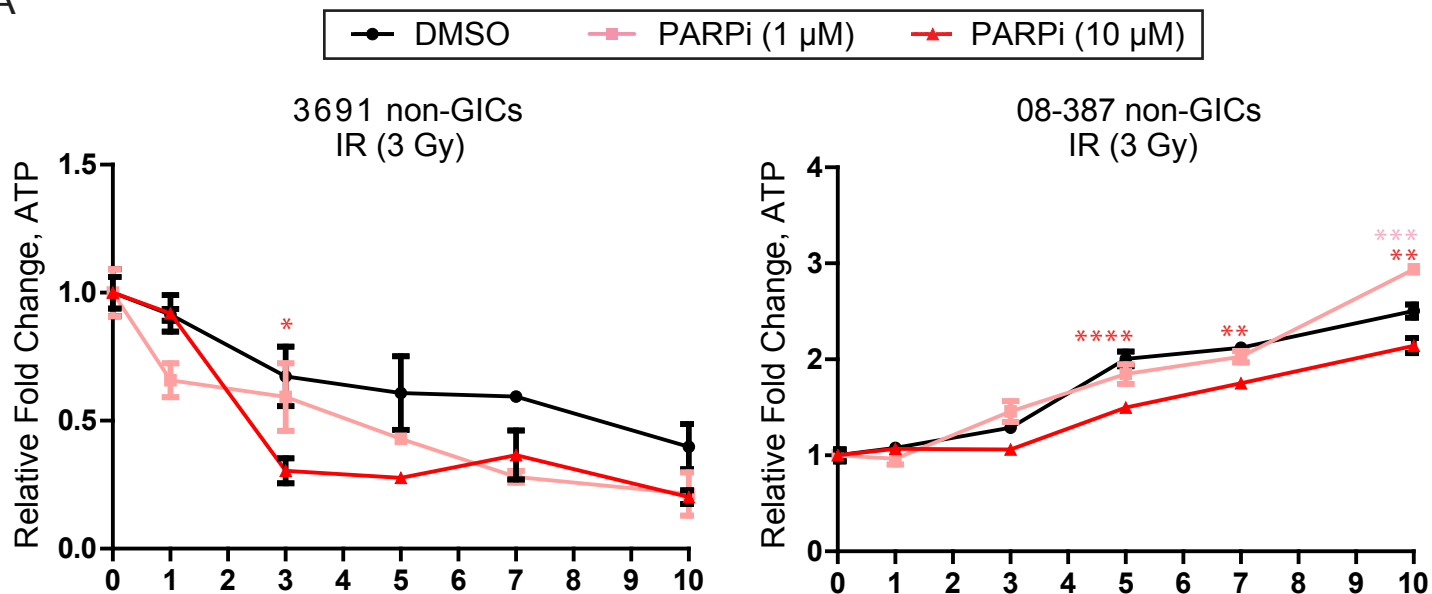

B

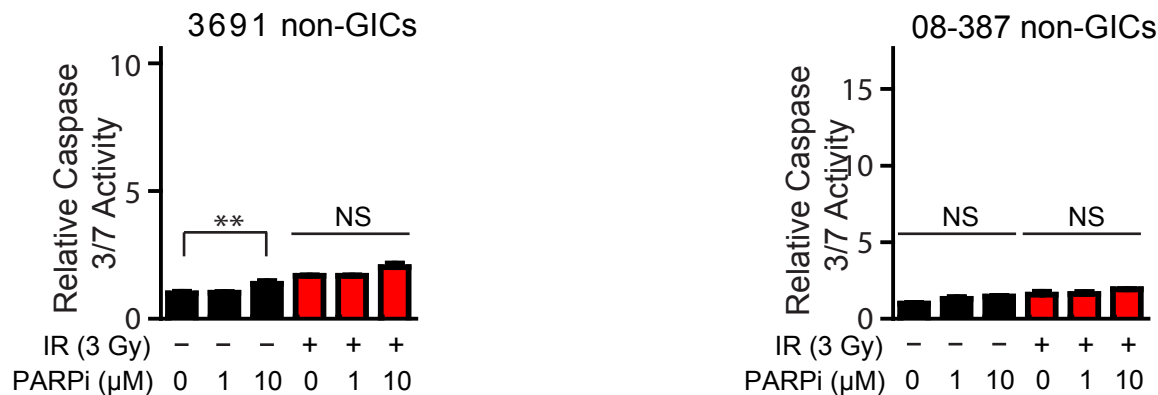

C

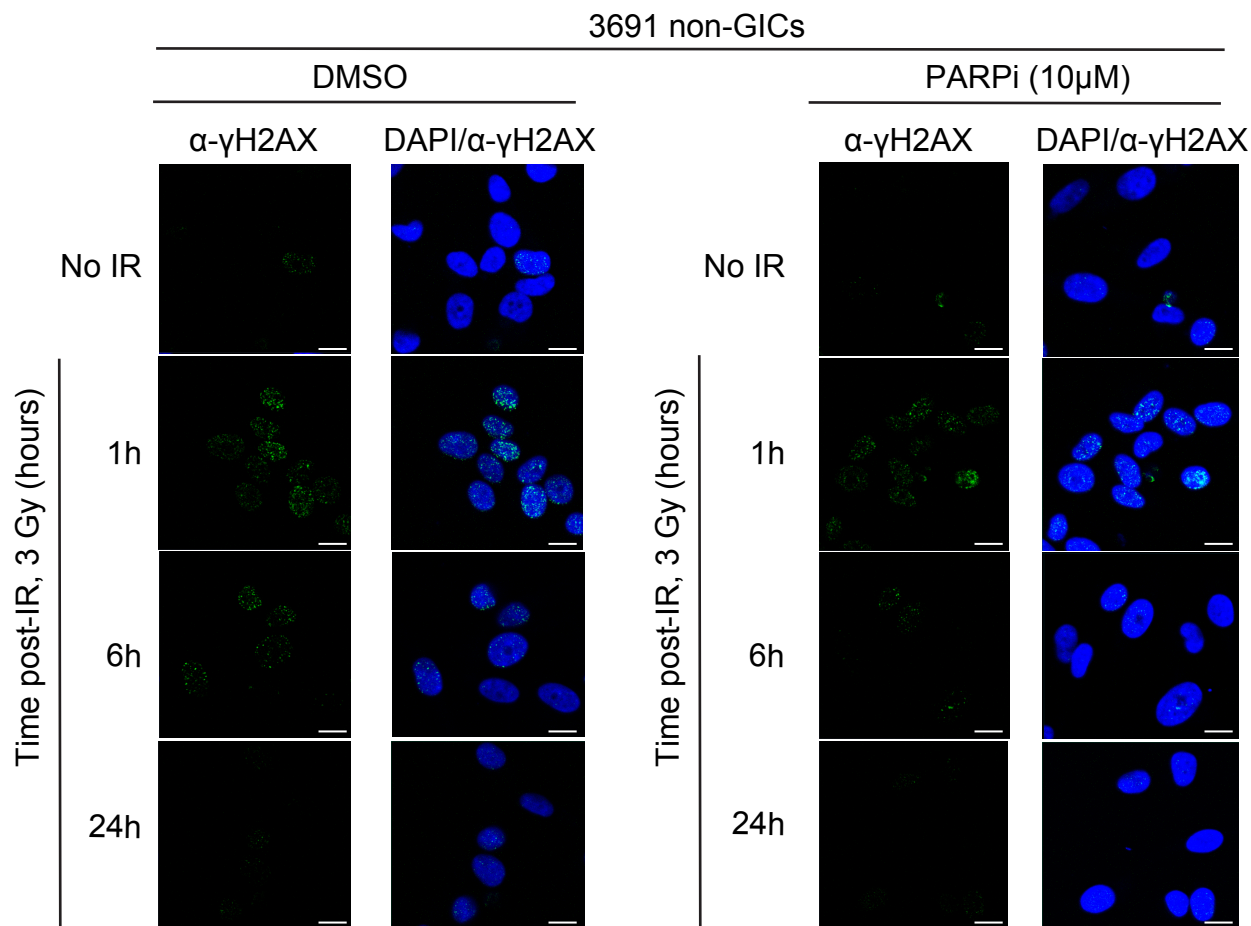

Supplement: cdd2013136x1.pdf [file cdd2013136x1.pdf]
